1  
2  
3  
4  
5  
6  
7  
8  
9  
10  
11  
12  
13  
14  
15  
16  
17  
18  
19  
20  
21

Potential risk polarization for acute myocardial infarction during the COVID-19 pandemic: Single-center experiences in Osaka, Japan

Masato Furui<sup>1,2\*</sup>, Kenji Kawajiri<sup>3</sup>, Takeshi Yoshida<sup>2</sup>, Bunpachi Kakii<sup>2</sup>, Norikazu Oshiro<sup>2</sup>, Mai Asanuma<sup>2</sup>, Hiroaki Nishioka<sup>4</sup>, Hideichi Wada<sup>1</sup>

<sup>1</sup> Cardiovascular Surgery Department, Fukuoka University Hospital, Nanakuma, Fukuoka, Fukuoka, Japan

<sup>2</sup> Cardiovascular Surgery Department, Matsubara Tokushukai Hospital, Amamihigashi, Matsubara, Osaka, Japan

<sup>3</sup> Cardiology Department, Matsubara Tokushukai Hospital, Amamihigashi, Matsubara, Osaka, Japan

<sup>4</sup> Surgery Department, Matsubara Tokushukai Hospital, Amamihigashi, Matsubara, Osaka, Japan

Short title: Acute myocardial infarction after the COVID-19 pandemic  
NOTE: This preprint reports new research that has not been certified by peer review and should not be used to guide clinical practice.

22

23 \* Corresponding author:

24 E-mail: [masatofurui@yahoo.co.jp](mailto:masatofurui@yahoo.co.jp) (MF)

25

## 26 **Abstract**

27           This study compared the time course and outcomes of acute myocardial infarction,  
28 including mechanical complications and hospital mortality, before and after the coronavirus  
29 disease 2019 (COVID-19) pandemic at a regional core hospital in South Osaka, Japan.  
30 Moreover, it identified predictors for hospital mortality and mechanical complications. In total,  
31 503 patients who underwent emergency percutaneous coronary intervention between January  
32 2011 and December 2021 at our institution were examined retrospectively. The time course of  
33 acute myocardial infarction, mechanical complications, and mortality rate before and after the  
34 COVID-19 emergency declaration were compared. Overall, 426 patients with ST-segment  
35 elevation myocardial infarction and 77 patients with non-ST-segment elevation myocardial  
36 infarction were identified. For patients with ST-segment elevation myocardial infarction, the  
37 onset-to-door time was longer (181 vs. 156 min,  $P = 0.001$ ) and mechanical complications  
38 were worse (7.8% vs. 2.6%,  $P = 0.025$ ) after the emergency declaration of COVID-19 than  
39 before the pandemic. Age, low ejection fraction, out-of-hospital cardiac arrest, and mechanical  
40 complications were identified as independent risk factors for hospital mortality among patients  
41 with ST-segment elevation myocardial infarction, using multivariable analysis.  
42 Post-declaration, age, walk-ins, referrals, and intra-aortic balloon pump use were independent  
43 predictors of mechanical complications among patients with ST-segment elevation myocardial  
44 infarction. Onset-to-door time and mechanical complication rate increased after the COVID-19  
45 declaration among patients with ST-segment elevation myocardial infarction. Arrival by  
46 walk-in and a referral that caused treatment delay were identified as independent risk factors  
47 for mechanical complication, in addition to age, use of intra-aortic balloon pump, and  
48 post-declaration of COVID-19. Therefore, the risks posed by the COVID-19 pandemic might  
49 have a polarization tendency resulting from the relief or worsening of cardiac symptoms.

## 51 **Introduction**

52           The coronavirus disease 2019 (COVID-19) pandemic has been in existence since  
53 2020. The infection situation is not much different in Japan, and the nation has already  
54 experienced the sixth wave of COVID-19. Common behavioral patterns have been adjusted to  
55 reduce infection risk, and patients are being asked to avoid population-dense areas for the same  
56 reason. Accordingly, a reduction in hospitalizations for acute myocardial infarction (AMI) has  
57 been reported. [1–6] Although the impact of the COVID-19 pandemic on door-to-balloon time  
58 and mechanical complications of AMI have been previously examined in other countries, such  
59 reports are still scarce in Japan. [7–10]

60           A few studies on percutaneous coronary intervention (PCI) impact in Tokyo, Japan,  
61 have been reported; however, whether these are relevant to other regions is unknown due to the  
62 rural-urban emergency care disparity. [11,12] For example, South Osaka does not include a  
63 metropolitan area, being the second largest prefecture in Japan; therefore, accessibility to  
64 PCI-capable institutions will be different from that in Tokyo. [13,14] After the pandemic,  
65 studies considering consultation forms, such as walk-ins, direct arrival by emergency medical  
66 service (EMS), or referral transport from other non-PCI-capable facilities, are rare. [14]

67           Therefore, this study compared the time course and outcomes of AMI, including  
68 mechanical complications and in-hospital mortality, before and after the COVID-19 pandemic  
69 declaration at a regional core hospital in South Osaka, Japan. Moreover, this study examined  
70 whether differences in types of hospital visits were a predictor of the outcomes.

71

## 72 **Materials and Methods**

## 73 **Study design and population**

74           The study protocol conformed to the ethical guidelines of the Declaration of Helsinki  
75 and was approved by the Ethics Committee of the Matsubara Tokushukai Hospital (approval  
76 number: 22-01). The informed consent requirement from patients was waived due to the  
77 retrospective nature of this study. The corresponding author (Masato Furui) has full access to  
78 all data in this study and takes responsibility for data integrity and analysis.

79           This study was a retrospective observational cohort study conducted on patients who  
80 underwent emergency PCI for AMI at the Matsubara Tokushukai Hospital in Osaka, Japan,  
81 between January 2011 and December 2021. The medical records of 796 patients with acute  
82 coronary syndrome (ACS) were reviewed, and data of 503 AMI patients were extracted after  
83 excluding those with recent myocardial infarction (MI) with an onset-to-door time >14 days  
84 and unstable angina pectoris. The participants were classified into ST-segment elevation  
85 myocardial infarction (STEMI) and non-STEMI (NSTEMI) groups. The Japanese government  
86 declared a state of emergency on April 7, 2020, following the World Health Organization's  
87 initial declaration of COVID-19 as a pandemic on March 11, 2020. [15,16] With this  
88 emergency declaration as a borderline, the characteristics, time course, and outcomes were  
89 compared before and after the declaration to evaluate the impact of the COVID-19 pandemic  
90 on both the STEMI and NSTEMI groups (Figure 1).

91

92 **Fig 1. Flow chart illustrating the selection of the study participants.** Abbreviations: ACS,  
93 acute coronary syndrome; AMI, acute myocardial infarction; MI, myocardial infarction;  
94 NSTEMI, non-ST-segment elevation myocardial infarction; STEMI, ST-segment elevation  
95 myocardial infarction; UAP, unstable angina pectoris.

96

## 97 **Definitions**

98 AMI was defined based on the fourth universal definition of MI, and ACS was defined  
99 according to the Japanese Circulation Society guidelines. [17,18] Infarction was classified into  
100 STEMI or NSTEMI, depending on the presence or absence of ST-segment elevation.  
101 Onset-to-door time and door-to-balloon time were defined as the time from symptom onset to  
102 hospital arrival and from hospital arrival to balloon dilation or thrombus aspiration,  
103 respectively. [19] In the present study, renal dysfunction was defined as creatinine level >1.5  
104 mg/dL. Left ventricular ejection fraction (LVEF) was assessed using echocardiography.  
105 Primary PCI was defined as urgent balloon angioplasty (with or without stenting) without  
106 employing fibrinolytic therapy to open the infarct-related artery.

107 The primary outcomes were onset-to-balloon time and in-hospital mortality. The  
108 secondary outcome was the incidence of mechanical complications. Therefore, we compared  
109 onset-to-door time, mechanical complications, and hospital mortality between patients before  
110 and after the COVID-19 emergency declaration in Japan. Mechanical complications, including  
111 cardiac rupture, ventricular septal perforation, and papillary muscle rupture, were assessed  
112 using echocardiography. [20–22]

113

## 114 **Statistical analysis**

115 Categorical variables were expressed as numbers and proportions, whereas  
116 continuous variables were presented as mean±standard deviation. Student's t-test, chi-squared  
117 test, and Mann–Whitney U test were utilized for other statistical analyses. Multivariate logistic  
118 regression analysis was performed for risk factors associated with hospital mortality and

119 mechanical complications in patients with STEMI. This analysis considered age, walk-ins,  
120 referrals, out-of-hospital cardiac arrest (OHCA), LVEF, single-vessel disease, anterior MI as a  
121 culprit, onset-to-door time, intra-aortic balloon pump (IABP) use, mechanical complications,  
122 and post-COVID-19 declaration, as possible predictors. [7,22,23] The odds ratios (OR) and  
123 95% confidence intervals (CI) were calculated. The number of patients who underwent  
124 venoarterial extracorporeal membrane oxygenation was few; therefore, it was not entered  
125 because we could not effectively analyze it. Moreover, NSTEMI analysis was not valid due to  
126 the small number. All statistical analyses were performed using JMP® version 9.0 (SAS  
127 Institute Inc., Cary, NC), and differences were considered statistically significant at a *P*-value  
128 <0.05.

129

## 130 **Results**

131 We extracted the data of 796 patients who required emergency PCI for ACS from  
132 medical records. Of these, 503 AMI patients were identified as participants in this study  
133 (Figure 1), of whom 426 and 77 patients were categorized into the STEMI and NSTEMI  
134 groups, respectively. Table 1 summarizes the basic characteristics, including the patients'  
135 background and pre-PCI examination findings before and after the COVID-19 declaration in  
136 each group. In the STEMI group, the number of patients with Killip classes III–IV was  
137 significantly higher after the declaration than it was before the declaration (12.0% [42/349] vs.  
138 21.3% [16/77], *P*=0.010). Although the prevalence of OHCA was not significantly different, it  
139 tended to be higher after the declaration (2.3% [8/349] vs. 6.5% [5/77], *P*=0.052). There were  
140 no significant differences in comorbidities, clinical presentation, and laboratory data before  
141 and after the declaration, except for Killip III–IV classification in the STEMI group, as

142 previously described.

143

144 **Table 1. Basic characteristics of AMI patients before and after the COVID-19**  
145 **declaration.**

| Demographic<br>s<br>n (%) or<br>mean±SD | STEMI (n=426)                    |                                |                 | NSTEMI (n=77)                   |                                |                 |
|-----------------------------------------|----------------------------------|--------------------------------|-----------------|---------------------------------|--------------------------------|-----------------|
|                                         | Before<br>declaration<br>(n=349) | After<br>declaration<br>(n=77) | <i>P</i> -value | Before<br>declaration<br>(n=62) | After<br>declaration<br>(n=15) | <i>P</i> -value |
| Age (year)                              | 67.7±12.6                        | 68.7±11.9                      | 0.514           | 67.3±12.7                       | 71.6±11.4                      | 0.152           |
| Sex (male)                              | 268<br>(76.8%)                   | 55 (71.4%)                     | 0.139           | 46 (74.2%)                      | 7 (46.7%)                      | 0.842           |
| Body mass<br>index (kg/m <sup>2</sup> ) | 24.0±4.0                         | 23.7±4.0                       | 0.642           | 23.7±3.9                        | 22.3±3.5                       | 0.703           |
| <i>Comorbidities</i>                    |                                  |                                |                 |                                 |                                |                 |
| Hypertension                            | 189<br>(54.2%)                   | 45 (58.4%)                     | 0.494           | 35 (56.5%)                      | 8 (53.3%)                      | 0.075           |
| Diabetes<br>mellitus                    | 100<br>(28.7%)                   | 24 (31.2%)                     | 0.660           | 15 (24.2%)                      | 3 (20.0%)                      | 0.737           |
| Dyslipidemia                            | 121<br>(34.7%)                   | 30 (39.5%)                     | 0.428           | 20 (32.3%)                      | 7 (46.7%)                      | 0.063           |
| Renal<br>dysfunction                    | 161<br>(46.1%)                   | 27 (35.0%)                     | 0.077           | 25 (40.3%)                      | 3 (20.0%)                      | 0.277           |
| Dialysis                                | 4 (1.1%)                         | 2 (2.6%)                       | 0.328           | 1 (1.6%)                        | 0 (0%)                         | 0.621           |



|                                    |             |            |        |            |            |        |
|------------------------------------|-------------|------------|--------|------------|------------|--------|
| Cerebral infarction                | 22 (6.3%)   | 5 (6.5%)   | 0.951  | 5 (8.1%)   | 3 (20.0%)  | 0.102  |
| COPD                               | 3 (0.9%)    | 0 (0%)     | 0.414  | 0 (0%)     | 10 (66.7%) | 0.041* |
| Prior PCI                          | 36 (10.3%)  | 7 (9.1%)   | 0.747  | 9 (14.5%)  | 2 (13.3%)  | 0.187  |
| <i>Clinical presentation</i>       |             |            |        |            |            |        |
| Killip classification <sup>†</sup> | 307 (88.0%) | 59 (78.7%) | 0.010* | 58 (93.5%) | 10 (100%)  | 0.312  |
| I – II                             |             |            |        |            |            |        |
| III–IV                             | 42 (12.0%)  | 16 (21.3%) |        | 4 (6.5%)   | 0 (0%)     |        |
| OHCA                               | 8 (2.3%)    | 5 (6.5%)   | 0.052  | 1 (1.6%)   | 1 (6.7%)   | 0.270  |
| LVEF (%)                           | 47±12       | 47±13      | 0.618  | 48±14      | 50±15      | 0.374  |
| <i>Laboratory data</i>             |             |            |        |            |            |        |
| CPK <sup>‡</sup> (U/L)             | 453±771     | 398±622    | 0.562  | 529±881    | 255±234    | 0.256  |
| Peak CPK (U/L)                     | 3198±2808   | 3428±3038  | 0.528  | 2073±2380  | 799±730    | 0.156  |
| CK-MB <sup>‡</sup> (U/L)           | 49±84       | 39±52      | 0.377  | 69±122     | 30±34      | 0.262  |
| Peak CK-MB (U/L)                   | 297±302     | 274±216    | 0.531  | 189±199    | 80±75      | 0.248  |
| Troponin I <sup>‡</sup> (pg/mL)    | 9378±3696   | 5491±1882  | 0.406  | 7905±2859  | 5855±1041  | 0.702  |
|                                    | 1           | 1          |        | 0          |            |        |

146 AMI, acute myocardial infarction; CK, creatine kinase-myocardial band; CPK, creatine  
 147 phosphokinase; LVEF, left ventricular ejection fraction; OHCA, out-of-hospital cardiac arrest;

148 PCI, percutaneous coronary intervention; and SD, standard deviation.

149 \* $P < 0.05$ .

150 †Killip classification after the declaration has a defect value of 2 in STEMI and 5 in NSTEMI.

151 ‡Value at admission.

152

153 Table 2 shows consultation types, (such as walk-ins, arrival by EMS, and referrals,) the time course, and outcomes before and after the declaration in each group. In the STEMI group, there were fewer referred patients after the declaration than there were before the declaration. However, there was no significant difference in the door-to-balloon time before and after the declaration (109±129 vs. 96±54 min,  $P=0.420$ ). Onset-to-door time (a primary outcome) in patients with STEMI was significantly longer after the COVID-19 declaration than it was before the declaration (156±134 vs. 181±145 min,  $P=0.001$ ).

160

161 **Table 2. Consultation type, time course, and outcomes in AMI patients before and after**  
 162 **the declaration.**

| Demographics        |     |    | STEMI (n=426) |            |                 | NSTEMI (n=77) |            |                 |
|---------------------|-----|----|---------------|------------|-----------------|---------------|------------|-----------------|
| n                   | (%) | or | Before        | After      | <i>P</i> -value | Before        | After      | <i>P</i> -value |
| mean±SD             |     |    | declaratio    | declaratio | e               | declaratio    | declaratio | e               |
|                     |     |    | n             | n          |                 | n             | n          |                 |
|                     |     |    | (n=349)       | (n=77)     |                 | (n=62)        | (n=15)     |                 |
| <i>Consultation</i> |     |    |               |            |                 |               |            |                 |
| <i>type</i>         |     |    |               |            |                 |               |            |                 |

|                            |                |            |        |            |            |       |
|----------------------------|----------------|------------|--------|------------|------------|-------|
| Walk-in                    | 50 (14.3%)     | 12 (16.0%) | 0.733  | 9 (14.5%)  | 3 (20%)    | 0.599 |
| EMS                        | 296<br>(85.3%) | 64 (83.1%) | 0.710  | 52 (83.9%) | 12 (80.0%) | 0.720 |
| In-hospital<br>patients    | 2 (0.6%)       | 1 (1.3%)   | 0.491  | 1 (1.6%)   | 0 (0%)     | 0.621 |
| Referral                   | 94 (27.0%)     | 11 (14.3%) | 0.019* | 19 (30.7%) | 2 (13.3%)  | 0.177 |
| <i>Time course</i>         |                |            |        |            |            |       |
| Onset-to-door<br>(min)     | 156±134        | 181±145    | 0.001* | 126±134    | 186±158    | 0.327 |
| Door-to-balloon<br>n (min) | 109±129        | 96±54      | 0.420  | 120±60     | 117±54     | 0.609 |
| <i>Culprit</i>             |                |            |        |            |            |       |
| LMT                        | 6 (1.7%)       | 1 (1.3%)   | 0.785  | 6 (9.7%)   | 0 (0%)     | 0.096 |
| LAD                        | 160<br>(45.9%) | 34 (44.2%) |        | 19 (30.7%) | 6 (40%)    |       |
| LCX                        | 34 (9.7%)      | 9 (11.7%)  |        | 16 (25.8%) | 8 (53.3%)  |       |
| RCA                        | 148<br>(42.4%) | 32 (41.6%) |        | 19 (30.7%) | 1 (6.7%)   |       |
| Diagonal<br>branch         | 1 (0.3%)       | 1 (1.3%)   |        | 2 (3.2%)   | 0 (0%)     |       |
| <i>Mechanical</i>          |                |            |        |            |            |       |
| <i>Circulatory</i>         |                |            |        |            |            |       |
| <i>Support</i>             |                |            |        |            |            |       |
| IABP                       | 22 (6.3%)      | 7 (9.1%)   | 0.383  | 7 (11.3%)  | 0 (0%)     | 0.172 |

|                                |            |            |        |          |          |        |
|--------------------------------|------------|------------|--------|----------|----------|--------|
| VA-ECMO                        | 11 (3.2%)  | 4 (5.2%)   | 0.382  | 2 (3.2%) | 0 (0%)   | 0.481  |
| <i>Outcomes</i>                |            |            |        |          |          |        |
| Mechanical complications       | 9 (2.6%)   | 6 (7.8%)   | 0.025* | 1 (1.6%) | 1 (6.7%) | 0.270  |
| Cardiac rupture                | 6 (1.7%)   | 3 (4.0%)   | 0.231  | 1 (1.6%) | 0 (0%)   | 0.621  |
| Ventricular septal perforation | 2 (0.6%)   | 2 (2.7%)   | 0.100  | 0 (0%)   | 0 (0%)   | -†     |
| Papillary muscle rupture       | 1 (0.3%)   | 1 (1.3%)   | 0.241  | 0 (0%)   | 1 (6.7%) | 0.041* |
| In-hospital mortality          | 36 (10.3%) | 11 (14.3%) | 0.299  | 5 (8.1%) | 1 (6.7%) | 0.856  |

163 EMS, emergency medical service; IABP, intra-aortic balloon pump; LAD, left anterior  
 164 descending coronary artery; LCX, left circumflex coronary artery; LMT, left main trunk;  
 165 NSTEMI, non-ST-segment elevation myocardial infarction; RCA, right coronary artery; SD,  
 166 standard deviation; STEMI, ST-segment elevation myocardial infarction; and VA-ECMO,  
 167 venoarterial extracorporeal membrane oxygenation.

168 \* $P < 0.05$ .

169 †The value is not valid.

170

171 Hospital mortality, another primary outcome, occurred in 11.0% (47/426) of patients  
 172 with STEMI and 7.8% (6/77) of patients with NSTEMI. Contrarily, mechanical complications,  
 173 a secondary outcome, occurred in 3.5% (15/426) of patients with STEMI patients and 2.6%

174 (2/77) of patients with NSTEMI. The mechanical complication rate was significantly higher  
175 after the COVID-19 declaration than it was before the declaration (2.6% [9/349] vs. 7.8%  
176 [6/77],  $P=0.025$ ) in the STEMI group; however, there was no significant difference in hospital  
177 mortality (10.3% [36/349] vs. 14.3% [11/77],  $P=0.299$ ).

178 Table 3 presents the results of the multivariate analysis for the primary outcomes. Age  
179 (1-year increase: OR 1.087, 95% CI 1.045–1.135,  $P \leq 0.0001$ ), OHCA (OR 61.883, 95% CI  
180 9.726–595.506,  $P<0.0001$ ), LVEF (1% increase: OR 0.943, 95% CI 0.911–0.975,  $P=0.0004$ ),  
181 IABP use (OR 10.523, 95% CI 3.544–33.544,  $P \leq 0.0001$ ), and mechanical complications (OR  
182 10.724, 95% CI 2.233–57.236,  $P=0.003$ ) were established as independent predictors of  
183 hospital mortality. Table 4 presents the results of the multivariate analysis for the secondary  
184 outcome. Age (1-year increase: OR 1.115, 95% CI 1.037–1.221,  $P=0.0019$ ), walk-in visits (OR  
185 14.695, 95% CI 3.265–80.468,  $P=0.0005$ ), referral visits (OR 4.854, 95% CI 1.050–25.003,  
186  $P=0.043$ ), IABP use (OR 29.094, 95% CI 4.209–255.552,  $P=0.0008$ ), and post-COVID-19  
187 declaration (OR 5.006, 95% CI 1.131–22.443,  $P=0.035$ ) were identified as independent  
188 predictors of mechanical complications.

189

190 **Table 3. Multivariate logistic regression analysis of risk factors for STEMI.**

| <b>Dependent variable: hospital mortality</b> |                   |               |                |
|-----------------------------------------------|-------------------|---------------|----------------|
|                                               | <b>Odds ratio</b> | <b>95% CI</b> | <b>P-value</b> |
| Age (per year)                                | 1.087             | 1.045–1.135   | <0.0001*       |
| Walk-in                                       | 2.000             | 0.527–10.829  | 0.332          |

|                                      |            |               |          |
|--------------------------------------|------------|---------------|----------|
| Referral                             | 0.744      | 0.289–1.999   | 0.550    |
| OHCA                                 | 61.883     | 9.726–595.506 | <0.0004* |
| LVEF (1% increase)                   | 0.943      | 0.911–0.975   | 0.0019*  |
| Single-vessel disease                | 1.009      | 0.420–2.418   | 0.9845   |
| Culprit: anterior (vs. others)       | 1.584      | 0.661–3.929   | 0.3042   |
| Onset-to-door time (per min)         | 1.001      | 0.998–1.005   | 0.5175   |
| IABP                                 | 10.523     | 3.544–33.544  | <0.0001* |
| Mechanical complications             | 10.724     | 2.233–57.236  | 0.0030*  |
| Post-declaration<br>pre-declaration) | (vs. 1.030 | 0.293–3.129   | 0.9603   |

191 CI, confidence interval; IABP, intra-aortic balloon pump; LVEF: left ventricular ejection  
 192 fraction; OHCA, out-of-hospital cardiac arrest; and STEMI, ST-segment elevation myocardial  
 193 infarction.

194 \* $P < 0.05$ .

195

196 **Table 4. Multivariate logistic regression analysis of risk factors for STEMI.**

| <b>Dependent variable: mechanical complications</b> |                   |               |                |
|-----------------------------------------------------|-------------------|---------------|----------------|
|                                                     | <b>Odds ratio</b> | <b>95% CI</b> | <b>P-value</b> |
| Age (per year)                                      | 1.115             | 1.037–1.221   | 0.0019*        |
| Walk-in                                             | 14.695            | 3.265–80.468  | 0.0005*        |
| Referral                                            | 4.854             | 1.050–25.003  | 0.0432*        |

|                                           |        |               |         |
|-------------------------------------------|--------|---------------|---------|
| LVEF (1% increase)                        | 0.971  | 0.915–1.030   | 0.276   |
| Single-vessel disease                     | 2.478  | 0.619–11.348  | 0.202   |
| Culprit: anterior (vs. others)            | 3.330  | 0.792–16.673  | 0.102   |
| Onset-to-door time (per min)              | 1.003  | 0.999–1.006   | 0.085   |
| IABP                                      | 29.094 | 4.209–255.552 | 0.0008* |
| Post-declaration<br>(vs. pre-declaration) | 5.006  | 1.131–22.443  | 0.035*  |

197 CI, confidence interval; IABP, intra-aortic balloon pump; LVEF, left ventricular ejection  
 198 fraction; and STEMI, ST-segment elevation myocardial infarction.

199 \* $P < 0.05$ .

200

201 Table 5 shows the association of walk-ins and referrals with the time course after the  
 202 declaration in patients with STEMI. Regarding arrival by walk-in, both onset-to-door and  
 203 door-to-balloon times were significantly extended in patients with walk-in arrivals, compared  
 204 with those from non-walk-in arrivals (175 vs. 127 min,  $P = 0.015$  and 150 vs. 95 min,  $P = 0.038$ ).  
 205 Conversely, referral patients had a significantly longer onset-to-door time (164 vs. 124 min,  
 206  $P = 0.016$ ) and shorter door-to-balloon time than non-referral patients (87 vs. 113 min,  
 207  $P = 0.009$ ).

208

209 **Table 5. The association of walk-ins and referrals with time course after COVID-19**  
 210 **declaration in the STEMI group.**

| Time course  | Walk-in | Non-walk-in | <i>P</i> -value | Referral | Non-referral | <i>P</i> -value |
|--------------|---------|-------------|-----------------|----------|--------------|-----------------|
| mean (range) | (n=65)  | (n=31)      |                 | (n=105)  | (n=321)      |                 |

|                               |              |                      |        |              |                              |        |
|-------------------------------|--------------|----------------------|--------|--------------|------------------------------|--------|
| Onset-to-door<br>time (min)   | 175<br>840)  | (12–<br>127 (6–1080) | 0.015* | 164<br>1080) | (6–<br>124 (6–840)           | 0.016* |
| Door-to-balloon<br>time (min) | 150<br>1337) | (42–<br>95 (29–437)  | 0.038* | 87<br>199)   | (29–<br>113<br>(38–<br>1337) | 0.009* |

211 STEMI indicates ST-segment elevation myocardial infarction.

212 \* $P < 0.05$ .

213

## 214 Discussion

215 Several studies have reported the impact of the COVID-19 pandemic on AMI in  
 216 Tokyo. [3,7] However, our hospital’s secondary medical service area in South Osaka is distinct  
 217 from that in Tokyo and has an unevenly distributed population, similar to hospitals, especially  
 218 PCI-capable facilities. [13,24,25] Moreover, arrival by walk-in or referral as risk factors for  
 219 AMI have rarely been discussed following the COVID-19 pandemic. Therefore, our study  
 220 investigated the influence of walk-ins and referrals on mechanical complications and hospital  
 221 mortality to address this and compare time course and outcomes before and after the  
 222 COVID-19 pandemic in STEMI and NSTEMI groups. We established that onset-to-door time  
 223 was prolonged and mechanical complications developed more frequently in STEMI patients  
 224 after the COVID-19 declaration, with no significant difference between both groups. These  
 225 findings suggest that, in addition to post-COVID-19 declaration, walk-ins and referrals were  
 226 risk factors for mechanical complications.

227 Regarding risk factors for hospital mortality, it was reported that patients with lower  
 228 LVEF have higher mortality rates and develop heart failure easily. [26,27] Once mechanical  
 229 complications occur, they can fatally affect patients’ hemodynamics. Although various



230 operative procedures and strategies in surgery timing have been devised, operative mortality  
231 remains high. [21,22,28] Therefore, investigating the risk factors and preventing subsequent  
232 complications may be important in reducing associated mortality.

233           Several risk factors for mechanical complications are known; previous studies have  
234 shown that established mechanical complication risk factors include age, female sex, anterior  
235 MI, de novo MI, and single-vessel disease. However, the analysis conducted in this study did  
236 not identify single-vessel disease and anterior MI as mechanical complication risk factors.  
237 [21,22] Moreover, once mechanical complications occur, patients often experience cardiogenic  
238 shock, thus requiring IABP use, which may naturally become a risk factor.

239           Considering previous findings, the identification of walk-ins and referrals as risk  
240 factors for mechanical complications are unique points in the present study. Walk-in patients  
241 often have mild symptoms, making this seem contradictory. However, in some cases with mild  
242 symptom presentation, patients' hearts can suffer from unnoticed load until AMI diagnosis,  
243 even after visiting the hospital because of unrestricted patient mobility or activity. Failure to  
244 limit this activity may become a mechanical complication risk. Thus, the time course for  
245 walk-in patients is distinct from that for patients transported by ambulance. Patients who notify  
246 the EMS are likely to immediately undergo consultation and check-ups by emergency doctors  
247 who begin monitoring as soon as the patient arrives at the hospital. Useful information by  
248 rescue crews generally aids in smooth AMI diagnosis. Conversely, walk-in patients have to  
249 wait longer for consultation or check-ups. Therefore, there may be a pronounced time lag from  
250 their arrival to diagnosis or PCI, compared with that of patients who notify EMS.

251           Referred patients were reported to have a prolonged onset-to-door time because they  
252 came from a nearby clinic or were transferred from non-PCI-capable facilities. [14,19]  
253 Previous studies reported that the time interval from an AMI onset to ventricular septal

254 perforation manifestation had a bimodal distribution; therefore, a longer ischemic time can  
255 become a risk factor for mechanical complications due to interactions with unknown factors.  
256 [10,22] In contrast, there was a significantly shorter door-to-balloon time in referred patients  
257 with STEMI after the pandemic declaration. Although we could not specify the reason,  
258 preparing for PCI in advance by referral request and an improved acceptance system by the  
259 regional cooperation office might achieve a shorter door-to-balloon time. In any case, because  
260 a referral is indispensable due to the surrounding non-PCI-capable facilities, we suggest that an  
261 effective EMS system and crew education on carrying suspected patients to PCI-capable  
262 facilities is important. [11,13,14]

263 In the STEMI group, OHCA rates tended to be higher after the declaration than it was  
264 before, although this failed to reach statistical significance. Given the potential for a higher  
265 OHCA rate and risk factors for mechanical complications, such as walk-ins and referrals, AMI  
266 risk polarization may have emerged on the clinical scene during the COVID-19 pandemic.  
267 Although rare, spontaneous reperfusion occurs in 7–30% of patients with STEMI, as stated in  
268 previous studies. [29,30] In addition, patients who follow stay-at-home orders and initially  
269 tolerate or adapt to their symptoms may likely experience spontaneous reperfusion. Walk-in  
270 patients with apparently mild symptoms or referred patients with STEMI may be at risk of  
271 mechanical complications, which were identified in the present study as mortality risk in  
272 STEMI after the COVID-19 pandemic. Therefore, care should be taken regarding walk-in or  
273 referral patients suspected of STEMI.

274 Conversely, more severe symptoms can result in patients notifying EMS; however,  
275 their situation can become critical due to delays that may lead to OHCA during transport to  
276 PCI-capable facilities. The fear of contracting COVID-19 may have led to patient hesitation to  
277 visit hospitals, resulting in risk polarization (Figure 2). Timely arrival to PCI-capable facilities

278 without hesitation is necessary for patients at risk of AMI.

279

280 **Fig 2. Polarization tendency of potential risks occurring from the patients' psychology**  
281 **and possible time course after the COVID-19 pandemic.** Abbreviations: EMS, emergency  
282 medical service; OHCA, out-of-hospital cardiac arrest.

283

284 The first limitation of this study is its retrospective observational design coupled with  
285 limited sample size from a single center. Our hospital covers only one of the areas in South  
286 Osaka. Thus, our data may not accurately represent Osaka as a whole because of emergency  
287 care or PCI volume disparity. [11–13] Second, additional data, encompassing EMS calls,  
288 transfer-to-door time, or COVID-19 examination waiting time, may be desirable in future  
289 studies to support the initial findings outlined in this study. Finally, the number of patients who  
290 died at home or during transport to our hospital was unknown and were excluded from the  
291 study population; therefore, OHCA and AMI prevalence rates may have been underestimated.  
292 Future research including these data will be required to further evaluate AMI-related mortality  
293 risk or mechanical complications during the COVID-19 pandemic.

294

## 295 **Conclusion**

296 The onset-to-door time was prolonged and mechanical complications developed more  
297 frequently in patients with STEMI after the COVID-19 pandemic declaration than it did  
298 before. Age, low LVEF, OHCA, IABP use, and mechanical complications were established as  
299 independent risk factors for hospital mortality in patients with STEMI. Additionally, age,

300 walk-ins, referrals, and IABP use were identified as independent predictors of mechanical  
301 complications in those with STEMI. Arrival by walk-in or referral, in patients with mild  
302 symptoms, influenced the outcomes of patients with AMI. Therefore, the risks posed by the  
303 COVID-19 pandemic might have a polarization tendency resulting from the relief or  
304 worsening of cardiac symptoms.

305

## 306 **Acknowledgments**

307 We would like to thank Editage for English editing services.

308

## 309 **References**

- 310 1. Bhatt AS, Moscone A, McElrath EE, Varshney AS, Claggett BL, Bhatt DL, et al.  
311 Fewer hospitalizations for acute cardiovascular conditions during the COVID-19  
312 pandemic. *J Am Coll Cardiol*. 2020; 76: 280-288.
- 313 2. Toscano O, Cosentino N, Campodonico J, Bartorelli AL, Marenzi G. Acute myocardial  
314 infarction during the COVID-19 pandemic: an update on clinical characteristics and  
315 outcomes. *Front Cardiovasc Med*. 2021; 8: 648290.
- 316 3. Arai R, Fukamachi D, Ebuchi Y, Migita S, Morikawa T, Monden M, et al. Impact of  
317 the COVID-19 outbreak on hospitalizations and outcomes in patients with acute  
318 myocardial infarction in a Japanese single center. *Heart Vessels*. 2021; 36: 1474-1483.
- 319 4. Morishita T, Takada D, Shin JH, Higuchi T, Kunisawa S, Imanaka Y. Trends, treatment  
320 approaches, and in-hospital mortality for acute coronary syndrome in Japan during the  
321 coronavirus disease 2019 pandemic. *J Atheroscler Thromb*. 2022; 29: 597-607.

- 322 5. De Rosa S, Spaccarotella C, Basso C, Calabrò MP, Curcio A, Filardi PP, et al.  
323 Reduction of hospitalizations for myocardial infarction in Italy in the COVID-19  
324 era. *Eur Heart J*. 2020; 41: 2083-2088.
- 325 6. Erol MK, Kayıkçıoğlu M, Kılıçkap M, Güler A, Yıldırım A, Kahraman F, et al.  
326 Treatment delays and in-hospital outcomes in acute myocardial infarction during the  
327 COVID-19 pandemic: a nationwide study. *Anatol J Cardiol*. 2020; 24: 334-342.
- 328 7. Watanabe Y, Miyachi H, Mozawa K, Yamada K, Oka E, Shiomura R, et al. Impact of  
329 the COVID-19 pandemic on ST-elevation myocardial infarction from a single-center  
330 experience in Tokyo. *Intern Med*. 2021; 60: 3693-3700.
- 331 8. Kitahara S, Fujino M, Honda S, Asaumi Y, Kataoka Y, Otsuka F, et al. COVID-19  
332 pandemic is associated with mechanical complications in patients with ST-elevation  
333 myocardial infarction. *Open Heart*. 2021; 8: e001497.
- 334 9. Kobayashi S, Sakakura K, Jinnouchi H, Taniguchi Y, Tsukui T, Watanabe Y, et al.  
335 Comparison of door-to-balloon time and in-hospital outcomes in patients with  
336 ST-elevation myocardial infarction between before versus after COVID-19  
337 pandemic. *Cardiovasc Interv Ther*. 2022; 37: 641-650.
- 338 10. Fardman A, Zahger D, Orvin K, Oren D, Kofman N, Mohsen J, et al. Acute myocardial  
339 infarction in the Covid-19 era: Incidence, clinical characteristics and in-hospital  
340 outcomes- A multicenter registry. *PLoS ONE* 2021; 16: e0253524
- 341 11. Masuda J, Kishi M, Kumagai N, Yamazaki T, Sakata K, Higuma T, et al. Rural-urban  
342 disparity in emergency care for acute myocardial infarction in Japan. *Circ J*. 2018; 82:  
343 1666-1674.
- 344 12. Matsuzawa Y, Konishi M, Nakai M, Saigusa Y, Taguri M, Gohbara M, et al.

- 345 In-hospital mortality in acute myocardial infarction according to population density  
346 and primary angioplasty procedures volume. *Circ J.* 2020; 84: 1140-1146.
- 347 13. Kinoshita N, Imai K, Kinjo K, Naka M. Longitudinal study of acute myocardial  
348 infarction in the southeast Osaka district from 1988 to 2002. *Circ J.* 2005; 69:  
349 1170-1175.
- 350 14. Higuma T, Hanada H, Okumura K. Direct transfer, shorter onset-to-balloon time, and  
351 better clinical outcome in ST-segment elevation myocardial infarction. *Circ J.*  
352 2015; 79: 1897-1899.
- 353 15. Mahase E. COVID-19: WHO declares pandemic because of "alarming levels" of  
354 spread, severity, and inaction. *BMJ* 2020; 368: m1036.
- 355 16. Looi MK. COVID-19: Japan declares state of emergency as Tokyo cases soar. *BMJ*  
356 2020; 369: m1447.
- 357 17. Thygesen K, Alpert JS, Jaffe AS, Chaitman BR, Bax JJ, Morrow DA, et al. Fourth  
358 Universal Definition of Myocardial Infarction (2018). *J Am Coll Cardiol.* 2018; 72:  
359 2231-2264.
- 360 18. Kimura K, Kimura T, Ishihara M, Nakagawa Y, Nakao K, Miyauchi K, et al. JCS 2018  
361 guideline on diagnosis and treatment of acute coronary syndrome. *Circ J.* 2019; 83:  
362 1085-1196.
- 363 19. Tsukui T, Sakakura K, Taniguchi Y, Yamamoto K, Seguchi M, Wada H, et al.  
364 Association between the door-to-balloon time and mid-term clinical outcomes in  
365 patients with ST-segment elevation myocardial infarction. *Intern Med.* 2020; 59:  
366 1597-1603.
- 367 20. Hochman JS, Buller CE, Sleeper LA, Boland J, Dzavik V, Sanborn TA, et al.

- 368           Cardiogenic shock complicating acute myocardial infarction--etiologies, management  
369           and outcome: a report from the SHOCK Trial Registry. Should we emergently  
370           revascularize Occluded Coronaries for cardiogenic shock? J Am Coll Cardiol.  
371           2000; 36: 1063-1070.
- 372           21. Honda S, Asaumi Y, Yamane T, Nagai T, Miyagi T, Noguchi T, et al. Trends in the  
373           clinical and pathological characteristics of cardiac rupture in patients with acute  
374           myocardial infarction over 35 years. J Am Heart Assoc. 2014; 3: e000984.
- 375           22. Damluji AA, van Diepen S, Katz JN, Menon V, Tamis-Holland JE, Bakitas M, et al.  
376           Mechanical complications of acute myocardial infarction: a scientific statement from  
377           the American Heart Association. Circulation 2021; 144: e16-e35.
- 378           23. Novak M, Hlinomaz O, Groch L, Rezek M, Semenka J, Sikora J, et al. Ventricular  
379           septal rupture - a critical condition as a complication of acute myocardial infarction. J  
380           Crit Care Med (Targu Mures). 2015; 1: 162-166.
- 381           24. Osaka prefectural government-estimated population (monthly report). Available at:  
382           <https://www.pref.osaka.lg.jp/toukei/jinkou/jinkou-xlslist.html>. Accessed March 27,  
383           2022.
- 384           25. Japan medical analysis platform by the Japan Medical Association. Available at:  
385           <https://jmap.jp/cities/detail/pref/27>. Accessed March 27, 2022.
- 386           26. Murphy SP, Ibrahim NE, Januzzi JL. Heart failure with reduced ejection fraction: a  
387           review. JAMA 2020; 324: 488-504.
- 388           27. Packer M, Anker SD, Butler J, Filippatos G, Ferreira JP, Pocock SJ, et al. Effect of  
389           empagliflozin on the clinical stability of patients with heart failure and a reduced  
390           ejection fraction: the EMPEROR-Reduced Trial. Circulation 2021; 143: 326-336.

- 391 28. Furui M, Sakurai Y, Kakii B, Asanuma M, Nishioka H, Yoshida T. Benefits and risks  
392 of delayed surgery for ventricular septal rupture after acute myocardial infarction. *Int*  
393 *Heart J* 2022; 63: 433-440.
- 394 29. Uriel N, Moravsky G, Blatt A, Tourovski A, Gabara Z, Inna Y, et al. Acute myocardial  
395 infarction with spontaneous reperfusion: clinical characteristics and optimal timing for  
396 revascularization. *Isr Med Assoc J.* 2007; 9: 243-246.
- 397 30. Li X, Li B, Gao J, Wang Y, Xue S, Jiang D, et al. Influence of angiographic  
398 spontaneous coronary reperfusion on long-term prognosis in patients with ST-segment  
399 elevation myocardial infarction. *Oncotarget* 2017; 8: 79767-79774.



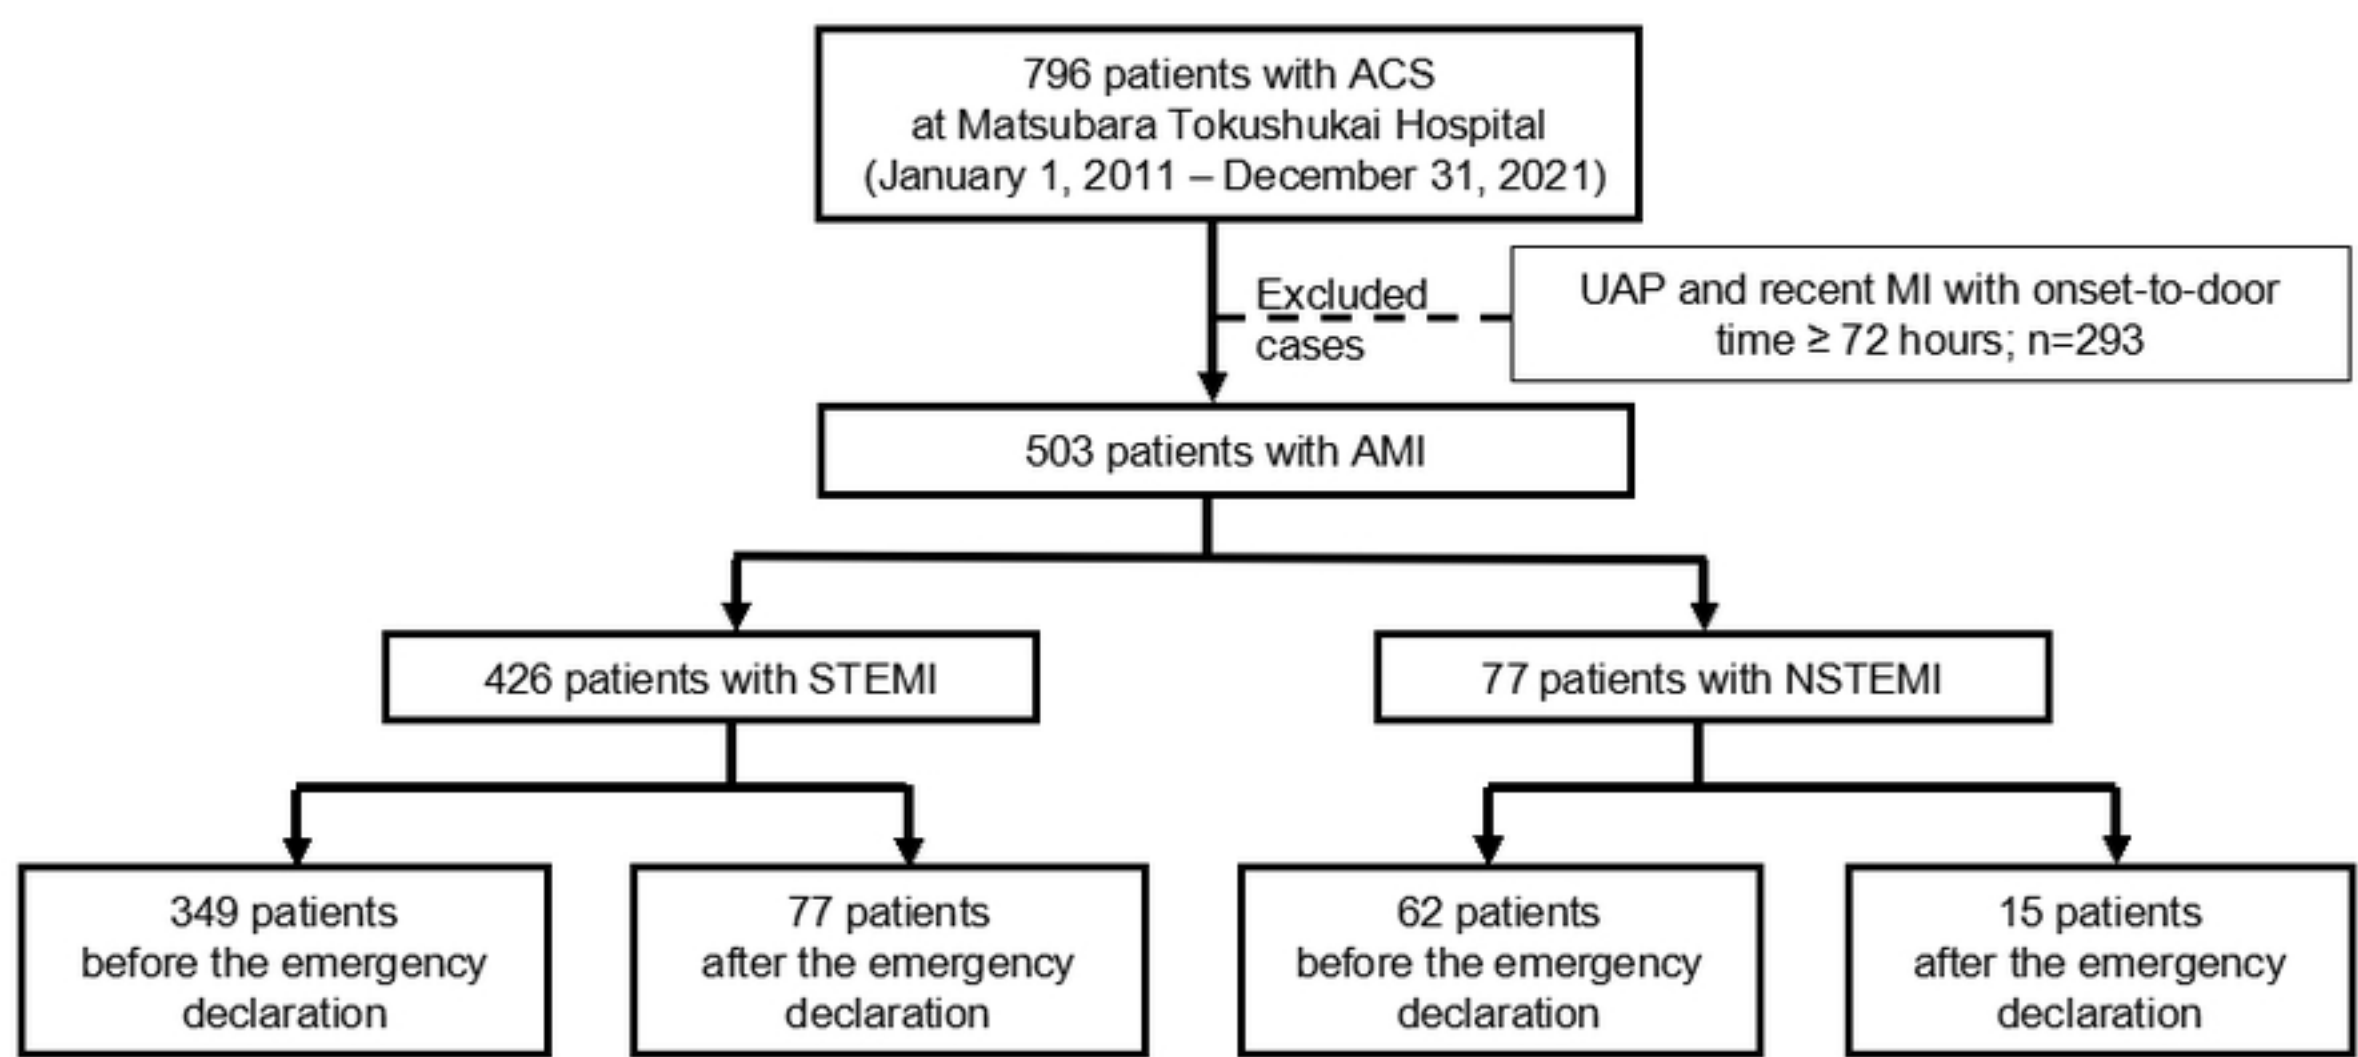

Figure 1

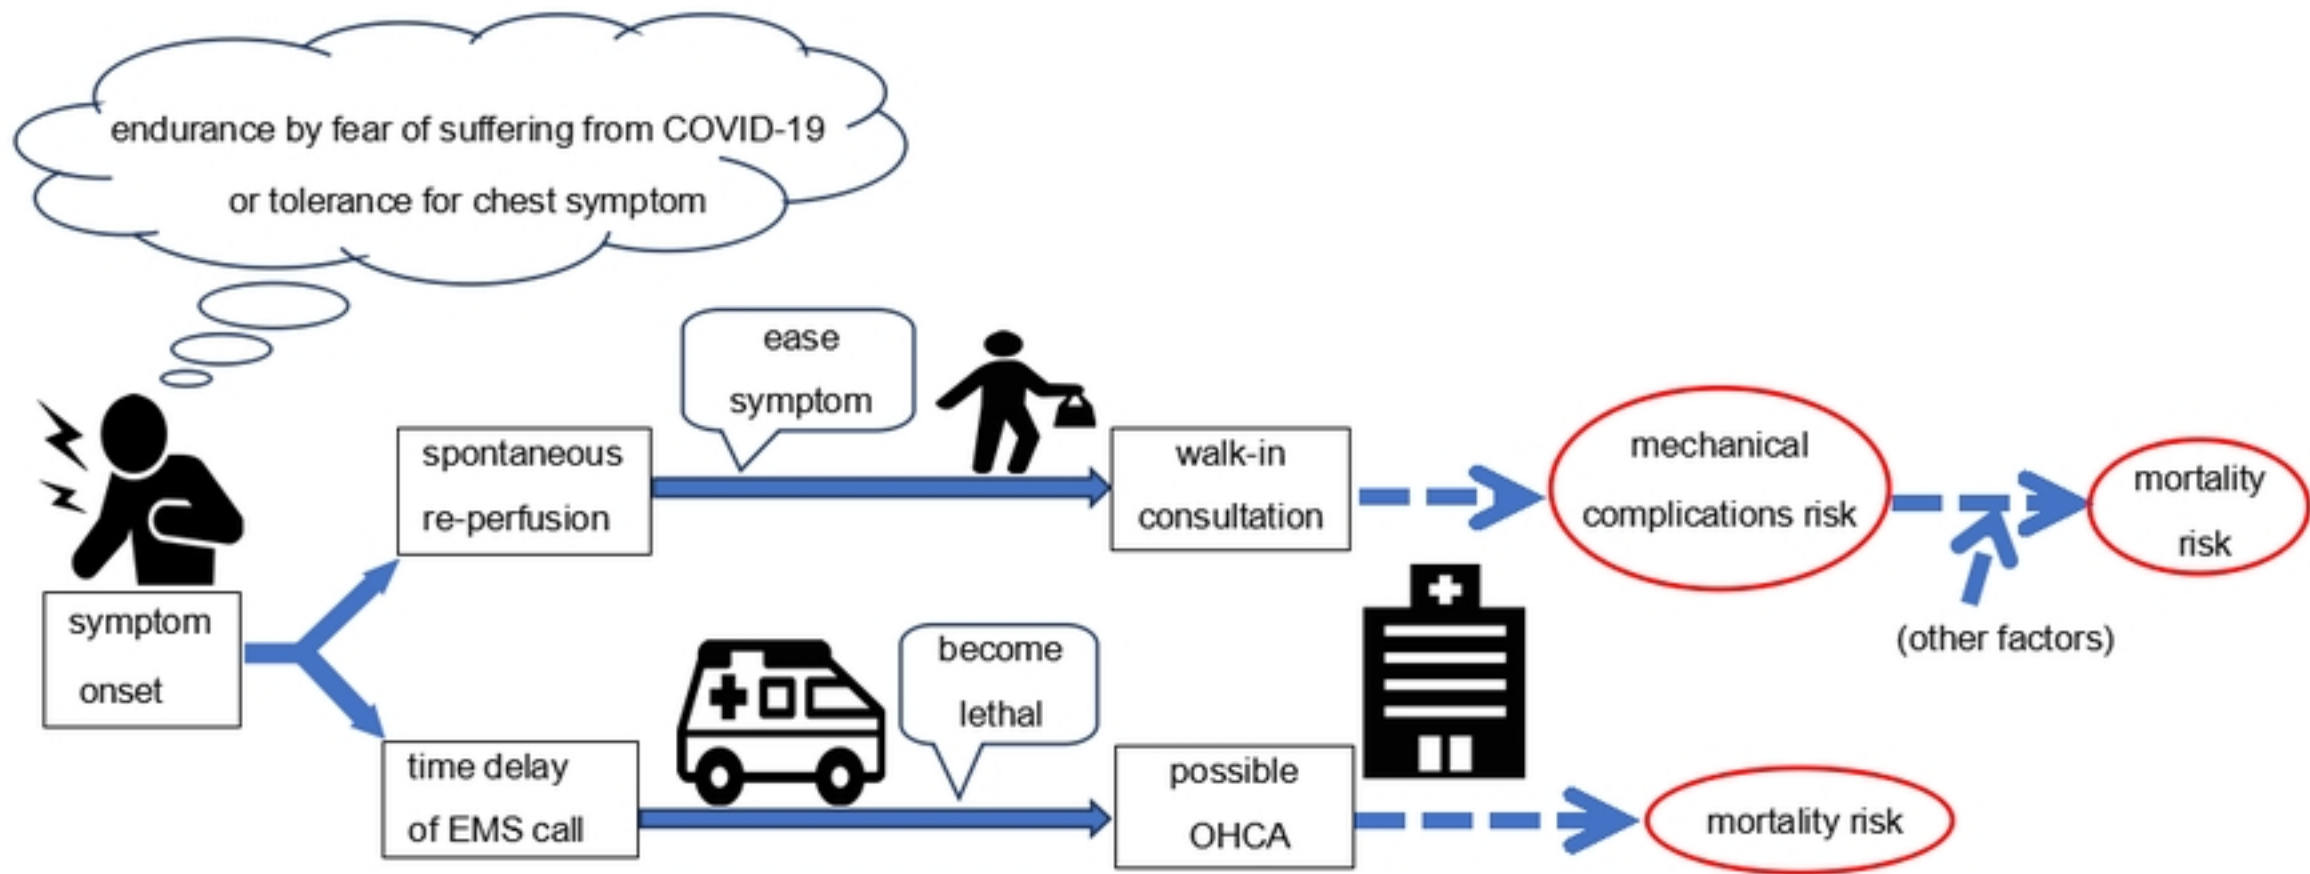

Figure 2
